# Supplementary material
Source: Springer Nature journal article supplement (https://www.springermedizin.de/resource/supplementary/13006_2012_141_MOESM2_ESM.pdf/9628060)

**Breastfeeding Practices by Age, Ghana 1993**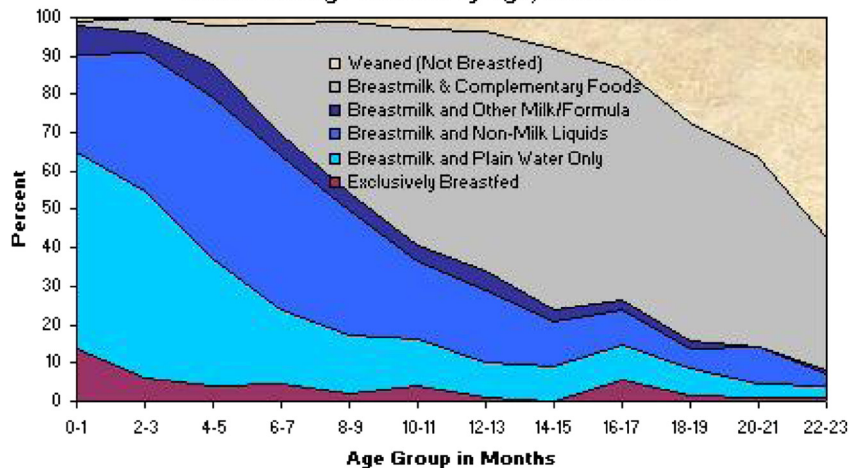**Breastfeeding Practices by Age, Ghana 1998**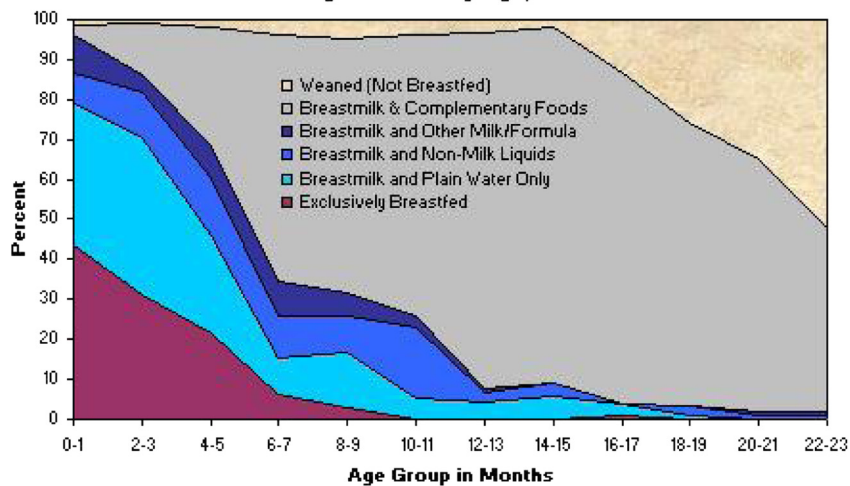**Breastfeeding Practices by Age, Ghana 2008**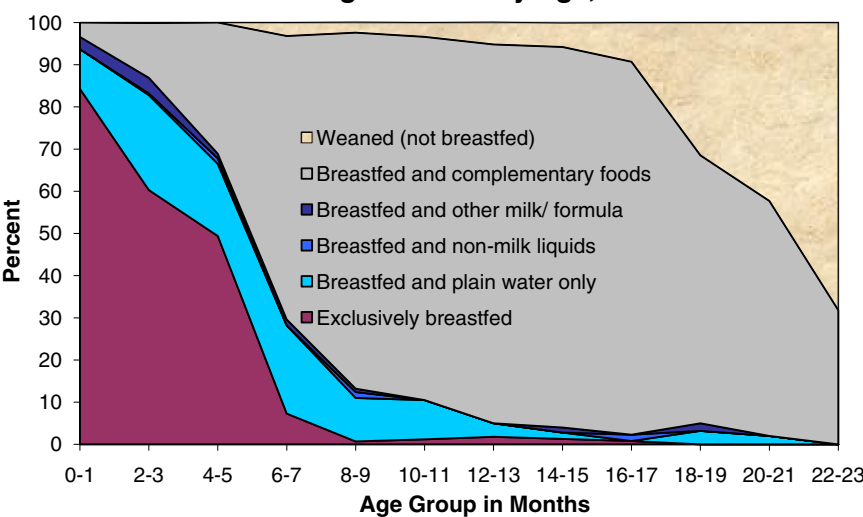

Supplement: MOESM2 [file 9628060]
